# Supplementary material for: Distinct Gut Microbial Enterotypes and Functional Dynamics in Wild Striped Field Mice (Apodemus agrarius) across Diverse Populations
Source: MDPI journal article supplement (doi:10.3390/microorganisms12040671), 2024-03-28
Supplement: s1 [file s1]

# **Supplementary Information for:** **Distinct Gut Microbial Enterotypes and Functional Dynamics in Wild Striped Field Mice (*Apodemus agrarius*) Across Diverse Populations**

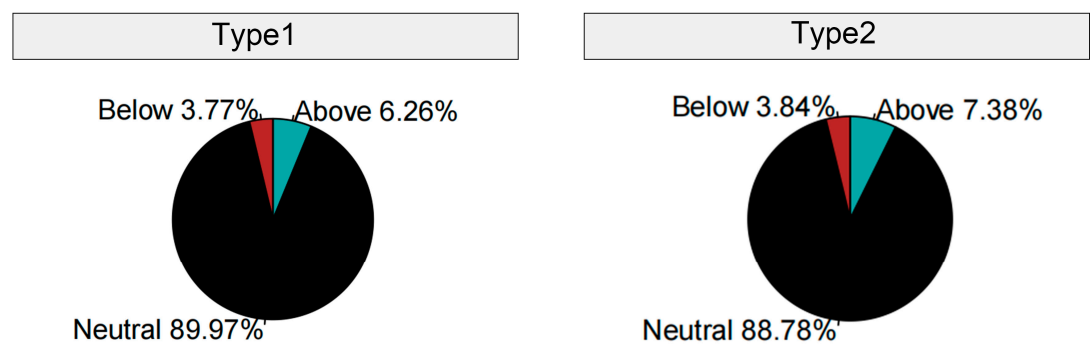

Figure S1 The degree of fitting of different intestinal types of ASVs in the neutral model. Percentage represents the number of ASVs within and outside the 95% confidence interval of the neutral model prediction.

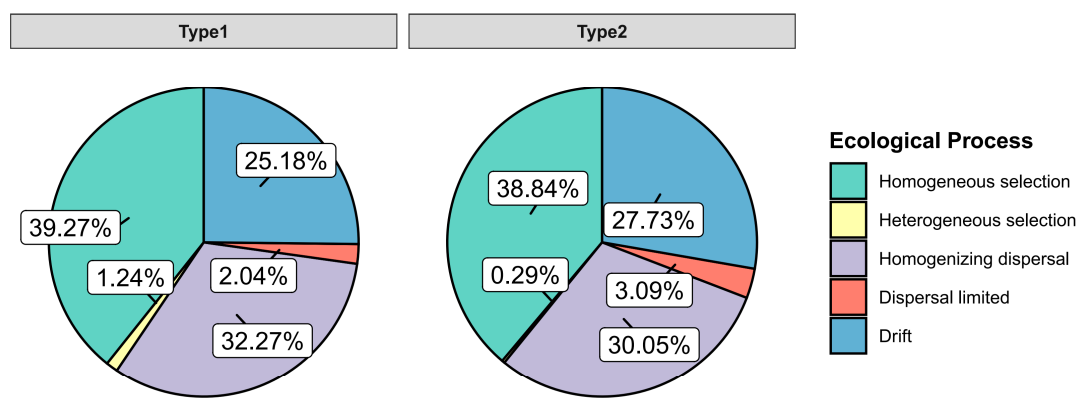

Figure S2 Contributions of deterministic ( $|\beta_{NTI}| \geq 2$ ) and stochastic processes ( $|\beta_{NTI}| < 2$ ) on gut microbiota community assembly in different enterotype of *A. agrarius*.
