# Supplementary material for: Distinct Gut Microbial Enterotypes and Functional Dynamics in Wild Striped Field Mice (Apodemus agrarius) across Diverse Populations
Source: Microorganisms. 2024 Mar 28;12(4):671. doi: 10.3390/microorganisms12040671 (PMC11052172; doi:10.3390/microorganisms12040671)
Supplement: Supplementary file 1 [file microorganisms-12-00671-s001.zip › Table S1.xls]

## Sheet: Sheet1
Sample ID	Species	Location	Sex	Weight	Body length	BMI	Sampling date	Enterotype
A.AP.6	A.agrarius	S1	female	24.97	86	0.00338	20-Jul	1
A.AP.9	A.agrarius	S1	female	29.38	96	0.00319	20-Jul	2
A.AP.7	A.agrarius	S1	female	30.54	96	0.00331	20-Jul	2
A.AP.11	A.agrarius	S1	male	31.2	84	0.00442	20-Jul	2
A.AP.3	A.agrarius	S1	male	31.16	105	0.00283	20-Jul	2
A.AP.8	A.agrarius	S1	female	34.45	114	0.00265	20-Jul	2
A.AP.4	A.agrarius	S1	female	33.94	97	0.00361	20-Jul	2
A.AP.2	A.agrarius	S1	female	41.48	104	0.00384	20-Jul	2
A.AP.1	A.agrarius	S1	male	40.51	105	0.00367	20-Jul	2
A.AP.5	A.agrarius	S1	male	35.72	96	0.00388	20-Jul	2
B.AP.5	A.agrarius	S2	male	22.81	88	0.00295	20-Jul	2
B.AP.7	A.agrarius	S2	male	23.63	96	0.00256	20-Jul	2
B.AP.1	A.agrarius	S2	male	26.22	93	0.00303	20-Jul	1
B.AP.8	A.agrarius	S2	female	31.13	101	0.00305	20-Jul	1
B.AP.6	A.agrarius	S2	male	30.58	92	0.00361	20-Jul	2
B.AP.2	A.agrarius	S2	female	34.03	93	0.00393	20-Jul	2
B.AP.3	A.agrarius	S2	male	34.19	93	0.00395	20-Jul	2
B.AP.4	A.agrarius	S2	male	34.58	106	0.00308	20-Jul	2
B.AP.12	A.agrarius	S2	female	35.46	98	0.00369	20-Jul	1
B.AP.11	A.agrarius	S2	male	35.43	101	0.00347	20-Jul	2
B.AP.9	A.agrarius	S2	male	36.54	101	0.00358	20-Jul	2
B.AP.10	A.agrarius	S2	male	36.42	103	0.00343	20-Jul	2
B.AP.13	A.agrarius	S2	female	28.71	120	0.00199	20-Jul	2
B.AP.16	A.agrarius	S2	female	32.16	111	0.00261	20-Jul	1
B.AP.15	A.agrarius	S2	female	26.51	109	0.00223	20-Jul	2
B.AP.14	A.agrarius	S2	female	30.95	95	0.00343	20-Jul	2
B.AP.23	A.agrarius	S2	male	26.53	105	0.00241	20-Jul	1
B.AP.18	A.agrarius	S2	female	27.68	102	0.00266	20-Jul	1
B.AP.17	A.agrarius	S2	female	30	105	0.00272	20-Jul	2
B.AP.21	A.agrarius	S2	female	27.73	107	0.00242	20-Jul	1
B.AP.22	A.agrarius	S2	female	34.7	117	0.00253	20-Jul	1
B.AP.24	A.agrarius	S2	male	40.77	117	0.00298	20-Jul	1
B.AP.20	A.agrarius	S2	male	38.91	127	0.00241	20-Jul	1
B.AP.19	A.agrarius	S2	female	19.42	95	0.00215	20-Jul	1
C.AP.1	A.agrarius	S3	female	27.97	91	0.00338	20-Aug	1
C.AP.3	A.agrarius	S3	female	29.51	94	0.00334	20-Aug	1
C.AP.2	A.agrarius	S3	male	28.05	90	0.00346	20-Aug	1
C.AP.15	A.agrarius	S3	male	33.59	96	0.00364	20-Aug	1
C.AP.5	A.agrarius	S3	female	35.99	103	0.00339	20-Aug	1
C.AP.4	A.agrarius	S3	female	38.22	114	0.00294	20-Aug	1
C.AP.14	A.agrarius	S3	male	44.22	114	0.0034	20-Aug	1
C.AP.9	A.agrarius	S3	male	28.42	103	0.00268	20-Aug	1
C.AP.12	A.agrarius	S3	male	30.18	99	0.00308	20-Aug	2
C.AP.11	A.agrarius	S3	female	29.91	98	0.00311	20-Aug	2
C.AP.8	A.agrarius	S3	female	34.8	102	0.00334	20-Aug	1
C.AP.13	A.agrarius	S3	female	30.7	98	0.0032	20-Aug	1
C.AP.10	A.agrarius	S3	male	37.84	107	0.00331	20-Aug	1
C.AP.6	A.agrarius	S3	male	39.7	115	0.003	20-Aug	1
C.AP.7	A.agrarius	S3	male	37.37	107	0.00326	20-Aug	1
D.AP.10	A.agrarius	S4	male	21.84	80	0.00341	20-Aug	1
D.AP.4	A.agrarius	S4	male	31.22	105	0.00283	20-Aug	1
D.AP.7	A.agrarius	S4	female	35.89	96	0.00389	20-Aug	1
D.AP.3	A.agrarius	S4	male	32.89	97	0.0035	20-Aug	1
D.AP.6	A.agrarius	S4	male	33.55	109	0.00282	20-Aug	1
D.AP.9	A.agrarius	S4	female	35.19	101	0.00345	20-Aug	1
D.AP.5	A.agrarius	S4	male	31.41	103	0.00296	20-Aug	1
D.AP.8	A.agrarius	S4	female	36.74	106	0.00327	20-Aug	1
D.AP.1	A.agrarius	S4	female	25.58	85	0.00354	20-Aug	2
D.AP.2	A.agrarius	S4	male	34.54	110	0.00285	20-Aug	2
E.AP.3	A.agrarius	S5	male	23.65	94	0.00268	20-Aug	2
E.AP.4	A.agrarius	S5	male	27.08	94	0.00306	20-Aug	2
E.AP.2	A.agrarius	S5	male	31.1	97	0.00331	20-Aug	2
E.AP.1	A.agrarius	S5	male	32.24	102	0.0031	20-Aug	2
E.AP.8	A.agrarius	S5	male	29.99	104	0.00277	20-Aug	2
E.AP.7	A.agrarius	S5	male	36.39	108	0.00312	20-Aug	2
E.AP.5	A.agrarius	S5	male	34.4	102	0.00331	20-Aug	2
E.AP.6	A.agrarius	S5	female	47.93	102	0.00461	20-Aug	2
H.AP10	A.agrarius	S6	male	36	113	0.0871914	21-Jul	1
H.AP11	A.agrarius	S6	female	29.4	98	0.113379	21-Jul	1
H.AP1	A.agrarius	S6	male	27.8	106	0.137156	21-Jul	2
H.AP2	A.agrarius	S6	male	26.7	98	0.137469	21-Jul	1
H.AP3	A.agrarius	S6	male	25.7	101	0.152917	21-Jul	2
H.AP4	A.agrarius	S6	male	39.5	116	0.0743471	21-Jul	1
H.AP5	A.agrarius	S6	male	20.1	79	0.19554	21-Jul	2
H.AP6	A.agrarius	S6	male	28.6	106	0.129591	21-Jul	1
H.AP7	A.agrarius	S6	male	37.1	102	0.0741058	21-Jul	1
H.AP8	A.agrarius	S6	male	31.1	104	0.107526	21-Jul	1
H.AP9	A.agrarius	S6	female	33.3	98	0.0883767	21-Jul	1
L.AP10	A.agrarius	S7	female	31.6	98	0.0981413	21-Aug	2
L.AP11	A.agrarius	S7	male	33.7	98	0.0862912	21-Aug	2
L.AP12	A.agrarius	S7	male	29.9	98	0.109618	21-Aug	2
L.AP13	A.agrarius	S7	male	36.2	113	0.0862306	21-Aug	2
L.AP14	A.agrarius	S7	male	30.6	105	0.112136	21-Aug	2
L.AP15	A.agrarius	S7	female	41	110	0.0654372	21-Aug	1
L.AP16	A.agrarius	S7	female	27.1	93	0.126632	21-Aug	1
L.AP1	A.agrarius	S7	female	22.5	92	0.181728	21-Aug	1
L.AP2	A.agrarius	S7	male	36.2	114	0.0869937	21-Aug	1
L.AP3	A.agrarius	S7	female	27.8	96	0.124217	21-Aug	1
L.AP4	A.agrarius	S7	female	28.8	96	0.115741	21-Aug	1
L.AP5	A.agrarius	S7	male	31.3	107	0.109218	21-Aug	2
L.AP6	A.agrarius	S7	female	34.8	101	0.0833994	21-Aug	1
L.AP7	A.agrarius	S7	female	34.1	92	0.0791187	21-Aug	2
L.AP8	A.agrarius	S7	male	22	102	0.210744	21-Aug	1
L.AP9	A.agrarius	S7	male	32.2	105	0.101269	21-Aug	1
