# Supplementary material for: Distinct Gut Microbial Enterotypes and Functional Dynamics in Wild Striped Field Mice (Apodemus agrarius) across Diverse Populations
Source: Microorganisms. 2024 Mar 28;12(4):671. doi: 10.3390/microorganisms12040671 (PMC11052172; doi:10.3390/microorganisms12040671)
Supplement: Supplementary file 1 [file microorganisms-12-00671-s001.zip › Table S2.xls]

## Sheet: KEGG- level 1
Taxa	avg(Type1)	sd(Type1)	avg(Type2)	sd(Type2)	p.value	q.values
Metabolism	0.468335	0.0106989	0.465892	0.0160813	0.190343	-0.00213848
Genetic Information Processing	0.191212	0.00821242	0.188733	0.00930809	0.182749	-0.00234647
Environmental Information Processing	0.154298	0.00751694	0.149082	0.0145609	0.053011	-0.00234647
Unclassified	0.136185	0.00383374	0.139081	0.00588987	0.00232492	-0.00234647
Cellular Processes	0.0343103	0.00530699	0.0404398	0.00573471	1.03362e-06	-0.00234647
Human Diseases	0.00787624	0.000646835	0.0083445	0.00169863	0.139748	-0.00234647
Organismal Systems	0.00640405	0.000505737	0.00679253	0.000619942	0.000482878	-0.00234647
None	0.00137884	0.000226896	0.0016344	0.000116809	4.03237e-11	-0.00234647
