# Supplementary material for: Distinct Gut Microbial Enterotypes and Functional Dynamics in Wild Striped Field Mice (Apodemus agrarius) across Diverse Populations
Source: Microorganisms. 2024 Mar 28;12(4):671. doi: 10.3390/microorganisms12040671 (PMC11052172; doi:10.3390/microorganisms12040671)
Supplement: Supplementary file 1 [file microorganisms-12-00671-s001.zip › Table S3.xls]

## Sheet: KEGG-level 2
Taxa	avg(Type1)	sd(Type1)	avg(Type2)	sd(Type2)	p.value	q.values
Membrane Transport	0.13396	0.00750166	0.127898	0.0133401	0.0158439	0.0125521
Carbohydrate Metabolism	0.105755	0.0036115	0.102172	0.00295167	3.02059e-08	1.59534e-07
Amino Acid Metabolism	0.0931922	0.00402296	0.0947764	0.00418831	0.127912	0.0675577
Replication and Repair	0.0849702	0.00452628	0.0839055	0.00525031	0.375857	0.170152
Energy Metabolism	0.0555859	0.00191695	0.0568854	0.00296323	0.0124971	0.0104218
Translation	0.0555988	0.00370257	0.0542083	0.00395459	0.0881311	0.0481521
Poorly Characterized	0.0485166	0.00134281	0.048739	0.00181658	0.795083	0.325384
Metabolism of Cofactors and Vitamins	0.0389872	0.00176054	0.0409211	0.00140027	1.46295e-08	1.159e-07
Nucleotide Metabolism	0.0399352	0.00227702	0.0387615	0.00227451	0.0286368	0.0206246
Cellular Processes and Signaling	0.036197	0.00247579	0.0386624	0.00263057	3.54747e-07	9.3681e-07
Cell Motility	0.026556	0.00527336	0.0321896	0.00613803	1.14762e-05	2.02041e-05
Lipid Metabolism	0.0305335	0.00217843	0.0288865	0.0022713	5.6852e-06	1.126e-05
Transcription	0.0275113	0.00125344	0.0270786	0.00186396	0.321498	0.149824
Genetic Information Processing	0.0260054	0.00127214	0.0263495	0.00142943	0.177811	0.0880427
Metabolism	0.0256553	0.000992152	0.0255543	0.00146905	0.0476084	0.0301736
Folding, Sorting and Degradation	0.0234163	0.000742972	0.023844	0.00128078	0.253139	0.121543
Glycan Biosynthesis and Metabolism	0.0206357	0.00174667	0.0238672	0.00240666	2.06658e-11	3.27443e-10
Enzyme Families	0.0208182	0.000611559	0.0210918	0.000645723	0.0239546	0.0180739
Xenobiotics Biodegradation and Metabolism	0.0222903	0.00362995	0.0190729	0.00349859	2.41898e-06	5.47543e-06
Signal Transduction	0.0185197	0.00178919	0.0195541	0.00247505	0.0353991	0.0233704
Metabolism of Terpenoids and Polyketides	0.017153	0.00132058	0.0160602	0.00142102	0.000196627	0.000259625
Metabolism of Other Amino Acids	0.0156435	0.000918783	0.0154372	0.000968456	0.152401	0.0778952
Biosynthesis of Other Secondary Metabolites	0.00843239	0.000560295	0.00871527	0.00107227	0.0711263	0.0402491
Cell Growth and Death	0.00512303	0.000280987	0.00503505	0.000435174	0.444435	0.195609
Infectious Diseases	0.00386752	0.000360303	0.00389617	0.00101624	0.0711263	0.0402491
Transport and Catabolism	0.00268077	0.000411952	0.00328224	0.000585696	9.03633e-08	2.86356e-07
Endocrine System	0.00267947	0.000408195	0.00271658	0.000462091	0.907118	0.359325
Signaling Molecules and Interaction	0.00202732	0.000254618	0.00188994	0.000197625	0.0124971	0.0104218
Neurodegenerative Diseases	0.00157444	0.00033768	0.00195454	0.000655469	0.00014224	0.000204886
Environmental Adaptation	0.00162567	0.000160111	0.00171237	0.000169552	0.00232492	0.00245585
Cancers	0.000987907	0.000106753	0.00108931	0.000136518	8.92846e-05	0.000141469
Metabolic Diseases	0.000949199	6.26137e-05	0.000950667	0.000117966	0.590271	0.252775
Nervous System	0.000887513	8.32703e-05	0.000926034	0.000103545	0.0122261	0.0104218
Immune System	0.00065301	0.000129837	0.000798003	0.000102657	4.75896e-08	1.88511e-07
Immune System Diseases	0.000483451	6.03252e-05	0.000444466	4.04066e-05	0.000315282	0.000384272
Digestive System	0.000256878	7.55266e-05	0.000261382	8.74012e-05	0.800897	0.325384
Excretory System	0.000211542	8.22299e-05	0.000215217	7.78484e-05	0.978982	0.378333
Circulatory System	9.88705e-05	7.26071e-05	0.00017407	0.00015759	0.00956845	0.00947557
Cardiovascular Diseases	2.39554e-05	2.71527e-05	2.24838e-05	3.934e-05	0.000999582	0.00113129
Cell Communication	5.58561e-07	6.47974e-07	5.39136e-07	1.08295e-06	0.0338806	0.0233403
Organismal Systems; Sensory System	1.70386e-07	2.12377e-07	1.61829e-07	3.52194e-07	0.0592728	0.0361215
