# Supplementary material for: Distinct Gut Microbial Enterotypes and Functional Dynamics in Wild Striped Field Mice (Apodemus agrarius) across Diverse Populations
Source: Microorganisms. 2024 Mar 28;12(4):671. doi: 10.3390/microorganisms12040671 (PMC11052172; doi:10.3390/microorganisms12040671)
Supplement: Supplementary file 1 [file microorganisms-12-00671-s001.zip › Table S4.xls]

## Sheet: KEGG-level 3
Taxa	avg(Type1)	sd(Type1)	avg(Type2)	sd(Type2)	p.value	q.values
Environmental Information Processing; Membrane Transport; Transporters	0.0727916	0.00613774	0.0696992	0.0091395	0.17538	0.0467058
Environmental Information Processing; Membrane Transport; ABC transporters	0.0353492	0.00252716	0.0338345	0.00387216	0.0220945	0.00751153
Unclassified; Poorly Characterized; General function prediction only	0.0342218	0.000877366	0.0345136	0.000813236	0.122291	0.0344328
Genetic Information Processing; Replication and Repair; DNA repair and recombination proteins	0.0274443	0.00130799	0.0266499	0.00135078	0.0136346	0.00523828
Genetic Information Processing; Translation; Ribosome	0.0229973	0.00186796	0.0224537	0.00215767	0.265938	0.0677188
Metabolism; Nucleotide Metabolism; Purine metabolism	0.0220687	0.00119408	0.0211447	0.000879725	5.71818e-05	5.62272e-05
Environmental Information Processing; Signal Transduction; Two-component system	0.0171681	0.00179815	0.0182436	0.0025759	0.0353991	0.0113127
Metabolism; Nucleotide Metabolism; Pyrimidine metabolism	0.0178665	0.00120745	0.0176161	0.00144341	0.534352	0.121975
Metabolism; Enzyme Families; Peptidases	0.017421	0.000641616	0.0176076	0.000936747	0.111625	0.0319932
Genetic Information Processing; Transcription; Transcription factors	0.0171443	0.00122078	0.0165077	0.00214906	0.0773211	0.0226696
Genetic Information Processing; Replication and Repair; Chromosome	0.0146406	0.00082619	0.0147649	0.000755552	0.282549	0.0710987
Unclassified; Poorly Characterized; Function unknown	0.0142956	0.000967943	0.0142258	0.00186282	0.0165298	0.00603715
Environmental Information Processing; Membrane Transport; Secretion system	0.0139615	0.00151472	0.0143875	0.00252195	0.942993	0.197611
Metabolism; Amino Acid Metabolism; Amino acid related enzymes	0.0141557	0.000584047	0.0143071	0.000769728	0.159043	0.0430729
Cellular Processes; Cell Motility; Bacterial motility proteins	0.0122314	0.00273806	0.0149145	0.0031895	4.47438e-05	4.76633e-05
Metabolism; Carbohydrate Metabolism; Amino sugar and nucleotide sugar metabolism	0.0138138	0.00118489	0.0135298	0.000831182	0.654145	0.143676
Genetic Information Processing; Translation; Ribosome Biogenesis	0.0134673	0.000730339	0.0131618	0.000648085	0.0353991	0.0113127
Metabolism; Energy Metabolism; Methane metabolism	0.0119922	0.000818949	0.0124569	0.000989915	0.000944535	0.000548817
Genetic Information Processing; Translation; Aminoacyl-tRNA biosynthesis	0.0121403	0.000834838	0.0116812	0.000941512	0.0176071	0.00625196
Metabolism; Amino Acid Metabolism; Arginine and proline metabolism	0.0114153	0.000947618	0.0121082	0.000570642	9.23491e-05	8.31336e-05
Unclassified; Cellular Processes and Signaling; Other ion-coupled transporters	0.0117225	0.000816619	0.0119022	0.00119555	0.984986	0.203082
Metabolism; Energy Metabolism; Oxidative phosphorylation	0.0111311	0.000927046	0.011787	0.00127972	0.0155103	0.00569737
Genetic Information Processing; Replication and Repair; DNA replication proteins	0.0113867	0.000880066	0.0115255	0.00105642	0.289384	0.0725331
Metabolism; Carbohydrate Metabolism; Glycolysis / Gluconeogenesis	0.011723	0.000859209	0.0105721	0.00043819	1.73856e-12	2.77799e-11
Metabolism; Carbohydrate Metabolism; Pyruvate metabolism	0.010843	0.00050883	0.0102992	0.000323032	4.00422e-09	2.7394e-08
Unclassified; Metabolism; Others	0.0108161	0.00098499	0.00988946	0.000889292	7.8058e-08	2.62583e-07
Metabolism; Energy Metabolism; Carbon fixation pathways in prokaryotes	0.00996692	0.000756009	0.0102504	0.000786414	0.0867173	0.0253083
Metabolism; Amino Acid Metabolism; Alanine, aspartate and glutamate metabolism	0.00950905	0.000451911	0.00992794	0.000673463	0.000109201	9.56106e-05
Genetic Information Processing; Folding, Sorting and Degradation; Chaperones and folding catalysts	0.00928829	0.000307382	0.00971895	0.000575477	7.28034e-05	6.84298e-05
Genetic Information Processing; Transcription; Transcription machinery	0.00860338	0.000609574	0.00900192	0.000910156	3.01992e-05	3.50942e-05
Metabolism; Carbohydrate Metabolism; Starch and sucrose metabolism	0.0088849	0.000941719	0.00886046	0.000911284	0.505009	0.116948
Unclassified; Metabolism; Energy metabolism	0.00835348	0.00101821	0.00901915	0.000760917	0.00258065	0.00127862
Genetic Information Processing; Replication and Repair; Homologous recombination	0.00878607	0.000571605	0.00873875	0.000752242	0.648717	0.142975
Metabolism; Amino Acid Metabolism; Cysteine and methionine metabolism	0.00868463	0.000283616	0.00872192	0.000251716	0.332695	0.0805462
Metabolism; Carbohydrate Metabolism; Fructose and mannose metabolism	0.00916275	0.0020592	0.00819564	0.000764943	0.00587258	0.00266202
Unclassified; Genetic Information Processing; Translation proteins	0.008463	0.000406889	0.0085603	0.000339246	0.220153	0.0574329
Metabolism; Carbohydrate Metabolism; Pentose phosphate pathway	0.00835657	0.000436333	0.00815772	0.000500181	0.124143	0.0348009
Metabolism; Metabolism of Cofactors and Vitamins; Porphyrin and chlorophyll metabolism	0.00778666	0.00133213	0.00841517	0.00114056	0.019538	0.00686137
Metabolism; Amino Acid Metabolism; Glycine, serine and threonine metabolism	0.00804586	0.000403434	0.00827798	0.000433358	0.0207823	0.00718001
Genetic Information Processing; Replication and Repair; Mismatch repair	0.00771303	0.000529239	0.00772525	0.000601407	0.687089	0.149881
Unclassified; Genetic Information Processing; Replication, recombination and repair proteins	0.00784851	0.000782331	0.00759052	0.000953835	0.00359713	0.00172865
Metabolism; Glycan Biosynthesis and Metabolism; Peptidoglycan biosynthesis	0.00777408	0.00050714	0.00751223	0.000428521	0.0303618	0.0100029
Metabolism; Amino Acid Metabolism; Phenylalanine, tyrosine and tryptophan biosynthesis	0.00713684	0.000780076	0.00796767	0.000520836	4.99323e-09	2.7394e-08
Metabolism; Carbohydrate Metabolism; Butanoate metabolism	0.00785662	0.000836457	0.00726004	0.0007887	0.000594543	0.000413045
Metabolism; Amino Acid Metabolism; Lysine biosynthesis	0.0074946	0.000469019	0.00768558	0.000579964	0.0254364	0.00851186
Metabolism; Amino Acid Metabolism; Valine, leucine and isoleucine biosynthesis	0.00689727	0.000541177	0.0071258	0.000397832	0.0239546	0.00810081
Unclassified; Genetic Information Processing; Protein folding and associated processing	0.00676654	0.000569775	0.00718372	0.000401665	8.92846e-05	8.1523e-05
Metabolism; Energy Metabolism; Nitrogen metabolism	0.00689151	0.000469587	0.00699295	0.000294656	0.321498	0.0781311
Metabolism; Carbohydrate Metabolism; Galactose metabolism	0.00679154	0.000799916	0.00675992	0.00102845	0.720632	0.154044
Cellular Processes; Cell Motility; Flagellar assembly	0.00576145	0.00141811	0.0074452	0.00169929	2.22542e-06	4.06392e-06
Metabolism; Carbohydrate Metabolism; Citrate cycle (TCA cycle)	0.00640959	0.000789248	0.00646835	0.000743006	0.766187	0.162694
Genetic Information Processing; Replication and Repair; DNA replication	0.00642053	0.000487742	0.00631943	0.000573663	0.405026	0.0951736
Environmental Information Processing; Membrane Transport; Bacterial secretion system	0.00601644	0.000530212	0.00624968	0.000731201	0.223019	0.0579441
Cellular Processes; Cell Motility; Bacterial chemotaxis	0.00542032	0.00121703	0.00662086	0.00144596	3.13103e-05	3.56306e-05
Metabolism; Lipid Metabolism; Lipid biosynthesis proteins	0.0062412	0.000556708	0.005979	0.000608657	0.0089385	0.00388642
Metabolism; Carbohydrate Metabolism; Propanoate metabolism	0.00636669	0.000894396	0.00576272	0.000913542	0.000528125	0.000370935
Genetic Information Processing; Folding, Sorting and Degradation; Protein export	0.00594428	0.0003658	0.0059127	0.000433668	0.726277	0.154733
Metabolism; Energy Metabolism; Carbon fixation in photosynthetic organisms	0.00582289	0.00033225	0.00587422	0.000378145	0.314169	0.0775293
Metabolism; Metabolism of Cofactors and Vitamins; Pantothenate and CoA biosynthesis	0.00563123	0.000240368	0.0059699	0.000277122	5.27491e-09	2.7394e-08
Metabolism; Metabolism of Cofactors and Vitamins; One carbon pool by folate	0.00566916	0.000313377	0.00580551	0.000544038	0.103304	0.0297416
Metabolism; Amino Acid Metabolism; Histidine metabolism	0.00532223	0.000419517	0.00572072	0.00052706	5.71818e-05	5.62272e-05
Metabolism; Carbohydrate Metabolism; Glyoxylate and dicarboxylate metabolism	0.00521549	0.00071814	0.00555477	0.000449164	0.0286368	0.00948352
Metabolism; Metabolism of Terpenoids and Polyketides; Terpenoid backbone biosynthesis	0.00555059	0.000382104	0.0053151	0.000469347	0.0104692	0.00436081
Metabolism; Lipid Metabolism; Glycerophospholipid metabolism	0.00542671	0.000269219	0.00535946	0.000168952	0.0735541	0.0216645
Genetic Information Processing; Translation; Translation factors	0.00517336	0.000335515	0.00514169	0.000439454	0.670538	0.146772
Metabolism; Carbohydrate Metabolism; Pentose and glucuronate interconversions	0.00478613	0.000678488	0.00511409	0.000507535	0.00209238	0.0010785
Unclassified; Cellular Processes and Signaling; Membrane and intracellular structural molecules	0.00453	0.000802168	0.0054177	0.00115062	4.97265e-05	5.04486e-05
Unclassified; Cellular Processes and Signaling; Sporulation	0.00439888	0.00180719	0.00528934	0.0017781	0.0109469	0.00445651
Cellular Processes; Cell Growth and Death; Cell cycle - Caulobacter	0.00490639	0.000249575	0.00489818	0.000406925	0.621855	0.139459
Metabolism; Lipid Metabolism; Fatty acid biosynthesis	0.00502808	0.000565621	0.00472094	0.000307678	0.00350774	0.00169846
Environmental Information Processing; Membrane Transport; Phosphotransferase system (PTS)	0.00584935	0.00203086	0.00371803	0.00138005	5.27491e-09	2.7394e-08
Metabolism; Metabolism of Cofactors and Vitamins; Thiamine metabolism	0.00448072	0.000281693	0.00453987	0.000352147	0.161304	0.043501
Genetic Information Processing; Folding, Sorting and Degradation; RNA degradation	0.00439537	0.000210667	0.00449358	0.000343085	0.198164	0.0519084
Unclassified; Cellular Processes and Signaling; Signal transduction mechanisms	0.00460365	0.000341339	0.00428601	0.000359915	5.83099e-07	1.28513e-06
Genetic Information Processing; Replication and Repair; Base excision repair	0.0045212	0.000275326	0.00427777	0.000222966	4.8455e-06	7.03863e-06
Metabolism; Lipid Metabolism; Glycerolipid metabolism	0.00446338	0.000427255	0.00414071	0.000408683	0.000325178	0.000256589
Metabolism; Metabolism of Cofactors and Vitamins; Nicotinate and nicotinamide metabolism	0.0039346	0.000174489	0.00398171	0.000264621	0.715002	0.15387
Genetic Information Processing; Replication and Repair; Nucleotide excision repair	0.00384192	0.000266273	0.00374502	0.000341954	0.303383	0.0751576
Metabolism; Metabolism of Other Amino Acids; Selenocompound metabolism	0.00377813	0.000152124	0.00363975	0.000145886	8.10492e-06	1.10218e-05
Metabolism; Glycan Biosynthesis and Metabolism; Lipopolysaccharide biosynthesis proteins	0.00312462	0.000789917	0.00418488	0.000984122	1.0451e-07	3.33988e-07
Metabolism; Metabolism of Cofactors and Vitamins; Folate biosynthesis	0.00353077	0.000426075	0.00374241	0.000421981	0.0176071	0.00625196
Metabolism; Energy Metabolism; Photosynthesis proteins	0.00368952	0.000290625	0.00357036	0.00035077	0.100115	0.0289541
Metabolism; Amino Acid Metabolism; Valine, leucine and isoleucine degradation	0.00375244	0.0012246	0.00322316	0.00126648	0.00278886	0.00137115
Metabolism; Energy Metabolism; Photosynthesis	0.00358932	0.000309329	0.00346327	0.000374291	0.127912	0.0357009
Metabolism; Enzyme Families; Protein kinases	0.00339567	0.000418153	0.00348369	0.000529198	0.282549	0.0710987
Metabolism; Amino Acid Metabolism; Tyrosine metabolism	0.00372775	0.000633171	0.00326241	0.000384222	4.47438e-05	4.76633e-05
Metabolism; Glycan Biosynthesis and Metabolism; Glycosyltransferases	0.00351422	0.000583701	0.00320915	0.000395687	0.0053348	0.00245304
Metabolism; Lipid Metabolism; Fatty acid metabolism	0.00345329	0.00106579	0.00291419	0.00106836	0.00155758	0.000843667
Unclassified; Cellular Processes and Signaling; Pores ion channels	0.00287321	0.000643124	0.00348491	0.000905916	0.000209599	0.00017627
Cellular Processes; Cell Motility; Cytoskeleton proteins	0.00314183	0.000444106	0.00320913	0.000457674	0.182749	0.0480674
Metabolism; Metabolism of Terpenoids and Polyketides; Prenyltransferases	0.00313393	0.000304588	0.0029495	0.000309064	0.00232492	0.00117934
Metabolism; Xenobiotics Biodegradation and Metabolism; Drug metabolism - other enzymes	0.00301876	0.000241371	0.00302994	0.000332972	0.529403	0.121279
Metabolism; Xenobiotics Biodegradation and Metabolism; Benzoate degradation	0.0032986	0.000700805	0.00267182	0.000629444	2.32028e-06	4.11946e-06
Metabolism; Carbohydrate Metabolism; C5-Branched dibasic acid metabolism	0.0028395	0.000301638	0.00301742	0.000197602	0.00111859	0.000638343
Metabolism; Biosynthesis of Other Secondary Metabolites; Streptomycin biosynthesis	0.0029241	0.000235314	0.00292272	0.000489561	0.554377	0.125649
Metabolism; Glycan Biosynthesis and Metabolism; Other glycan degradation	0.00228712	0.000660297	0.00317418	0.00091289	2.95238e-07	7.25774e-07
Metabolism; Metabolism of Other Amino Acids; Cyanoamino acid metabolism	0.00251866	0.000263374	0.00281349	0.000313355	1.68578e-07	5.13078e-07
Genetic Information Processing; Folding, Sorting and Degradation; Sulfur relay system	0.00270203	0.000336268	0.00255494	0.000433342	0.0172414	0.00622589
Metabolism; Amino Acid Metabolism; Tryptophan metabolism	0.00273271	0.000919331	0.00240724	0.000900152	0.0347332	0.011212
Metabolism; Glycan Biosynthesis and Metabolism; Lipopolysaccharide biosynthesis	0.00201444	0.000652709	0.00302492	0.000814177	1.53265e-09	1.39942e-08
Metabolism; Energy Metabolism; Sulfur metabolism	0.00249578	0.000273929	0.00248752	0.000270102	0.78928	0.167042
Metabolism; Metabolism of Other Amino Acids; Glutathione metabolism	0.00245847	0.00051725	0.00223089	0.000626509	0.00935424	0.00401259
Unclassified; Cellular Processes and Signaling; Inorganic ion transport and metabolism	0.00228367	0.000381503	0.00231856	0.00056023	0.367765	0.0870579
Unclassified; Cellular Processes and Signaling; Other transporters	0.00221329	0.000241075	0.00238557	0.000163596	0.000428103	0.000314508
Metabolism; Metabolism of Other Amino Acids; beta-Alanine metabolism	0.00225468	0.000579631	0.00226254	0.000600741	0.836001	0.175766
Metabolism; Amino Acid Metabolism; Phenylalanine metabolism	0.00218175	0.000438742	0.00211942	0.000414515	0.292842	0.0728288
Metabolism; Metabolism of Cofactors and Vitamins; Ubiquinone and other terpenoid-quinone biosynthesis	0.00217348	0.000443961	0.00215165	0.000603743	0.444435	0.104051
Metabolism; Metabolism of Cofactors and Vitamins; Riboflavin metabolism	0.0020056	0.000281371	0.0021582	0.000302817	0.0172414	0.00622589
Metabolism; Amino Acid Metabolism; Lysine degradation	0.00213216	0.000707886	0.0019223	0.000730588	0.0664659	0.0198445
Unclassified; Metabolism; Amino acid metabolism	0.00201342	0.000235386	0.00206608	0.000227645	0.182749	0.0480674
Metabolism; Xenobiotics Biodegradation and Metabolism; Aminobenzoate degradation	0.00227037	0.000651976	0.00174058	0.000630018	3.36496e-06	5.37678e-06
Unclassified; Cellular Processes and Signaling; Cell motility and secretion	0.00195836	0.000483106	0.00202252	0.000338069	0.231775	0.0599753
Metabolism; Xenobiotics Biodegradation and Metabolism; Chloroalkane and chloroalkene degradation	0.00214779	0.000319232	0.00185373	0.000258572	1.2288e-06	2.30996e-06
Metabolism; Lipid Metabolism; Sphingolipid metabolism	0.0017379	0.000420815	0.00213904	0.000569121	4.97265e-05	5.04486e-05
Cellular Processes; Transport and Catabolism; Peroxisome	0.0017958	0.000289733	0.00192483	0.000283566	0.11335	0.0323427
Metabolism; Metabolism of Cofactors and Vitamins; Vitamin B6 metabolism	0.00174106	0.000125437	0.00186383	0.00014015	2.4273e-05	2.92718e-05
Metabolism; Metabolism of Terpenoids and Polyketides; Polyketide sugar unit biosynthesis	0.00171752	0.00016796	0.00176934	0.000343814	0.170591	0.0456204
Organismal Systems; Environmental Adaptation; Plant-pathogen interaction	0.00159081	0.000176974	0.00169354	0.000177505	0.00244977	0.00123289
Metabolism; Metabolism of Terpenoids and Polyketides; Limonene and pinene degradation	0.00183722	0.000541226	0.00144344	0.000543503	0.000116713	0.000100807
Genetic Information Processing; Transcription; RNA polymerase	0.00173238	0.000176179	0.0015498	0.00012461	2.6918e-07	6.88185e-07
Metabolism; Xenobiotics Biodegradation and Metabolism; Naphthalene degradation	0.00179965	0.000390136	0.00148022	0.000241928	5.91568e-06	8.21957e-06
Unclassified; Genetic Information Processing; Restriction enzyme	0.0014896	0.000347676	0.00169931	0.000446205	0.0111929	0.00449933
Unclassified; Metabolism; Carbohydrate metabolism	0.00149756	0.000194732	0.00155845	0.000237326	0.135714	0.0377136
Metabolism; Lipid Metabolism; Biosynthesis of unsaturated fatty acids	0.00153799	0.000391807	0.00137023	0.00044636	0.00645821	0.00288654
Metabolism; Biosynthesis of Other Secondary Metabolites; Phenylpropanoid biosynthesis	0.00126197	0.000280511	0.00155128	0.000237937	1.76734e-07	5.13452e-07
Metabolism; Metabolism of Other Amino Acids; D-Glutamine and D-glutamate metabolism	0.00142006	9.84195e-05	0.00142409	0.000142889	0.948985	0.198217
Human Diseases; Infectious Diseases; Tuberculosis	0.00144981	0.000109802	0.00137859	0.000130484	0.00387774	0.00184959
Unclassified; Metabolism; Lipid metabolism	0.00139939	0.000131168	0.00134735	0.000171138	0.000315282	0.00025189
Metabolism; Carbohydrate Metabolism; Ascorbate and aldarate metabolism	0.0013683	0.000248501	0.00135719	0.000291999	0.250006	0.0639165
Metabolism; Metabolism of Cofactors and Vitamins; Biotin metabolism	0.00120548	0.000164944	0.00152602	0.000212159	9.56135e-13	2.03704e-11
Metabolism; Metabolism of Terpenoids and Polyketides; Tetracycline biosynthesis	0.00144435	0.000223996	0.00131228	0.0001649	0.00193205	0.00102055
Metabolism; Carbohydrate Metabolism; Inositol phosphate metabolism	0.00134012	0.000226271	0.00125938	0.000221645	0.0340779	0.0110563
Metabolism; Metabolism of Other Amino Acids; Taurine and hypotaurine metabolism	0.00134322	0.000133394	0.0012868	0.000112827	0.068764	0.0203474
Genetic Information Processing; Translation; RNA transport	0.00132283	0.000194913	0.00129926	0.000161953	0.462623	0.107914
Metabolism; Xenobiotics Biodegradation and Metabolism; Toluene degradation	0.00135035	0.000337552	0.00117739	0.000328451	0.0259475	0.00863767
Metabolism; Biosynthesis of Other Secondary Metabolites; Novobiocin biosynthesis	0.00119789	0.000112993	0.00127037	7.51744e-05	4.80105e-05	5.03047e-05
Environmental Information Processing; Signaling Molecules and Interaction; Bacterial toxins	0.00123431	0.000151179	0.00122828	0.000184397	0.514695	0.118761
Unclassified; Metabolism; Metabolism of cofactors and vitamins	0.00126266	0.000221281	0.00114525	0.000285586	0.00118283	0.00066316
Metabolism; Metabolism of Other Amino Acids; D-Alanine metabolism	0.00128227	0.00016956	0.00113333	8.42414e-05	4.25586e-07	9.71474e-07
Cellular Processes; Transport and Catabolism; Lysosome	0.000883453	0.000288446	0.00135752	0.000442991	5.00279e-08	1.7764e-07
Organismal Systems; Endocrine System; PPAR signaling pathway	0.00113991	0.000258935	0.00103823	0.000279605	0.0411251	0.0125766
Metabolism; Xenobiotics Biodegradation and Metabolism; Polycyclic aromatic hydrocarbon degradation	0.00118326	0.0002316	0.00102475	0.000184506	0.000402923	0.000306581
Metabolism; Glycan Biosynthesis and Metabolism; Glycosphingolipid biosynthesis - globo series	0.000940366	0.000219282	0.00124438	0.000393179	1.61413e-05	2.06334e-05
Metabolism; Biosynthesis of Other Secondary Metabolites; Tropane, piperidine and pyridine alkaloid biosynthesis	0.00104978	0.000158513	0.00103865	9.38083e-05	0.966977	0.200663
Metabolism; Metabolism of Terpenoids and Polyketides; Geraniol degradation	0.00112488	0.000610139	0.000879892	0.000654857	0.0102373	0.0043332
Metabolism; Metabolism of Terpenoids and Polyketides; Biosynthesis of ansamycins	0.000934939	0.000191392	0.00100626	0.000146938	0.0203602	0.00711103
Metabolism; Xenobiotics Biodegradation and Metabolism; Bisphenol degradation	0.00103368	0.000318788	0.00083508	0.000135367	1.38821e-05	1.84848e-05
Organismal Systems; Nervous System; Glutamatergic synapse	0.000887368	8.32803e-05	0.000926023	0.000103593	0.0116995	0.00467358
Environmental Information Processing; Signal Transduction; Phosphatidylinositol signaling system	0.000942918	0.000149469	0.000857867	8.13026e-05	0.000867159	0.000527851
Metabolism; Xenobiotics Biodegradation and Metabolism; Nitrotoluene degradation	0.000851257	0.000182524	0.000895415	0.000190027	0.611246	0.137563
Human Diseases; Infectious Diseases; Vibrio cholerae pathogenic cycle	0.000744841	0.000112421	0.000928654	0.000671225	0.000253441	0.000207675
Metabolism; Xenobiotics Biodegradation and Metabolism; Caprolactam degradation	0.000901968	0.000420986	0.000644477	0.000461587	0.000428103	0.000314508
Unclassified; Cellular Processes and Signaling; Electron transfer carriers	0.000885916	0.000496388	0.000626571	0.0003381	0.00135845	0.000755004
Human Diseases; Infectious Diseases; Epithelial cell signaling in Helicobacter pylori infection	0.000633352	0.000139155	0.000822832	0.000147587	5.57181e-09	2.7394e-08
Unclassified; Metabolism; Biosynthesis and biodegradation of secondary metabolites	0.000655585	0.000152429	0.000746829	0.000210992	0.0212121	0.00725009
Organismal Systems; Endocrine System; Insulin signaling pathway	0.000683641	9.6366e-05	0.000716083	6.79985e-05	0.0176071	0.00625196
Metabolism; Lipid Metabolism; Synthesis and degradation of ketone bodies	0.000747698	0.000230941	0.000570995	0.00023812	4.02324e-05	4.43353e-05
Human Diseases; Neurodegenerative Diseases; Alzheimers disease	0.000614005	9.68781e-05	0.000711674	0.000205412	0.0119603	0.00474807
Genetic Information Processing; Folding, Sorting and Degradation; Protein processing in endoplasmic reticulum	0.000618941	0.000135472	0.000688002	0.000122778	0.0077876	0.0034092
Metabolism; Xenobiotics Biodegradation and Metabolism; Dioxin degradation	0.00074083	0.000144442	0.000589316	9.37111e-05	1.90013e-08	7.14391e-08
Metabolism; Biosynthesis of Other Secondary Metabolites; Butirosin and neomycin biosynthesis	0.000632093	7.93542e-05	0.000675765	0.000131095	0.00147494	0.000805732
Metabolism; Lipid Metabolism; Linoleic acid metabolism	0.000671121	0.000245467	0.000573119	9.15141e-05	0.0207823	0.00718001
Unclassified; Cellular Processes and Signaling; Cell division	0.000523582	8.29272e-05	0.000666827	0.000107848	1.68564e-11	2.15475e-10
Unclassified; Metabolism; Nucleotide metabolism	0.000648207	0.000150835	0.000540567	0.000222256	4.12414e-06	6.27606e-06
Metabolism; Xenobiotics Biodegradation and Metabolism; Ethylbenzene degradation	0.000655821	0.000293632	0.000529313	0.00011876	0.00301214	0.00146962
Metabolism; Xenobiotics Biodegradation and Metabolism; Xylene degradation	0.000649971	0.000117835	0.000513083	8.87455e-05	5.65073e-10	6.01943e-09
Metabolism; Glycan Biosynthesis and Metabolism; Glycosaminoglycan degradation	0.000439513	0.000136192	0.000714766	0.000320511	2.23495e-07	6.21071e-07
Metabolism; Xenobiotics Biodegradation and Metabolism; Drug metabolism - cytochrome P450	0.000605623	0.000299194	0.000500384	0.000342121	0.0145461	0.00543691
Metabolism; Metabolism of Terpenoids and Polyketides; Biosynthesis of vancomycin group antibiotics	0.000563185	5.57182e-05	0.000576487	0.000108215	0.348009	0.0826876
Organismal Systems; Endocrine System; Adipocytokine signaling pathway	0.000545559	0.00017254	0.00056973	0.000177548	0.720632	0.154044
Metabolism; Xenobiotics Biodegradation and Metabolism; Metabolism of xenobiotics by cytochrome P450	0.000578599	0.000282473	0.000483653	0.000326172	0.0155103	0.00569737
Metabolism; Metabolism of Other Amino Acids; Phosphonate and phosphinate metabolism	0.000503833	7.36853e-05	0.000574329	7.06992e-05	2.85504e-06	4.93189e-06
Human Diseases; Metabolic Diseases; Type I diabetes mellitus	0.000533844	5.56409e-05	0.000547711	9.08242e-05	0.524477	0.120582
Human Diseases; Neurodegenerative Diseases; Huntingtons disease	0.000427812	0.000145048	0.000559997	0.000231039	0.000223362	0.000185405
Human Diseases; Cancers; Pathways in cancer	0.000464452	4.70549e-05	0.000517659	5.92652e-05	3.36496e-06	5.37678e-06
Genetic Information Processing; Translation; Ribosome biogenesis in eukaryotes	0.000493875	4.31218e-05	0.000467425	2.87499e-05	0.000773028	0.000484392
Metabolism; Biosynthesis of Other Secondary Metabolites; Isoquinoline alkaloid biosynthesis	0.000449219	6.5615e-05	0.000475838	4.77435e-05	0.0139327	0.00523828
Human Diseases; Immune System Diseases; Primary immunodeficiency	0.000481426	5.97071e-05	0.000443369	4.00823e-05	0.000415337	0.000312309
Environmental Information Processing; Signaling Molecules and Interaction; Cellular antigens	0.000424916	0.000122205	0.000473203	0.000128682	0.118652	0.0335558
Metabolism; Metabolism of Terpenoids and Polyketides; Zeatin biosynthesis	0.000436346	3.78457e-05	0.000441271	4.8212e-05	0.637915	0.141081
Environmental Information Processing; Signal Transduction; MAPK signaling pathway - yeast	0.000405726	7.60002e-05	0.00045344	9.0318e-05	0.0109469	0.00445651
Metabolism; Metabolism of Cofactors and Vitamins; Lipoic acid metabolism	0.000419111	9.72876e-05	0.000432973	0.000103578	0.627189	0.140163
Unclassified; Metabolism; Glycan biosynthesis and metabolism	0.000331099	0.000143693	0.000474219	0.000220165	6.12905e-05	5.84683e-05
Human Diseases; Metabolic Diseases; Type II diabetes mellitus	0.000415427	4.18834e-05	0.000402902	4.44308e-05	0.143874	0.0396366
Genetic Information Processing; Folding, Sorting and Degradation; Proteasome	0.000369548	7.51446e-05	0.000409959	5.13532e-05	0.00035662	0.000277967
Metabolism; Xenobiotics Biodegradation and Metabolism; Styrene degradation	0.000402076	0.000185241	0.000354697	0.000186119	0.115096	0.032695
Metabolism; Glycan Biosynthesis and Metabolism; Glycosphingolipid biosynthesis - ganglio series	0.000280666	9.67975e-05	0.000496256	0.000268927	2.34167e-07	6.23615e-07
Metabolism; Metabolism of Cofactors and Vitamins; Retinol metabolism	0.000409278	0.000145727	0.000333468	0.000145801	0.00914428	0.00394903
Human Diseases; Neurodegenerative Diseases; Amyotrophic lateral sclerosis (ALS)	0.000313942	7.34234e-05	0.000370612	5.31249e-05	5.92028e-05	5.73324e-05
Metabolism; Xenobiotics Biodegradation and Metabolism; Atrazine degradation	0.000305518	0.000119324	0.000371291	0.00011525	0.000482878	0.000346776
Human Diseases; Cancers; Prostate cancer	0.0003006	6.88217e-05	0.000388611	6.23415e-05	9.07158e-09	3.62381e-08
Organismal Systems; Immune System; NOD-like receptor signaling pathway	0.00029831	6.778e-05	0.000387087	5.78255e-05	2.16002e-09	1.72572e-08
Organismal Systems; Endocrine System; Progesterone-mediated oocyte maturation	0.000295122	6.68592e-05	0.000378099	5.58753e-05	7.71944e-09	3.28925e-08
Organismal Systems; Immune System; Antigen processing and presentation	0.000295122	6.68592e-05	0.000378099	5.58753e-05	7.71944e-09	3.28925e-08
Metabolism; Xenobiotics Biodegradation and Metabolism; Chlorocyclohexane and chlorobenzene degradation	0.000332428	0.000176241	0.000258718	0.000199475	0.00168948	0.000907418
Metabolism; Metabolism of Terpenoids and Polyketides; Biosynthesis of siderophore group nonribosomal peptides	0.000298468	0.000128428	0.000294109	0.000252056	0.0122261	0.00479406
Human Diseases; Infectious Diseases; Pertussis	0.000250678	0.000223567	0.000315876	0.000329974	0.237745	0.061026
Metabolism; Lipid Metabolism; Primary bile acid biosynthesis	0.000287213	9.64432e-05	0.000270545	6.92236e-05	0.82426	0.17387
Metabolism; Biosynthesis of Other Secondary Metabolites; Penicillin and cephalosporin biosynthesis	0.000293201	0.000133864	0.000241237	0.000148841	0.0122261	0.00479406
Human Diseases; Infectious Diseases; Staphylococcus aureus infection	0.000457153	0.000300752	0.000132847	9.1279e-05	5.71269e-15	3.65126e-13
Environmental Information Processing; Signaling Molecules and Interaction; Ion channels	0.000366136	0.000142785	0.000188002	7.52436e-05	7.61563e-13	2.03704e-11
Metabolism; Glycan Biosynthesis and Metabolism; N-Glycan biosynthesis	0.000236519	8.61458e-05	0.00027219	7.50851e-05	0.00183146	0.00097548
Metabolism; Lipid Metabolism; Arachidonic acid metabolism	0.000262811	0.000141351	0.00024168	0.000151431	0.292842	0.0728288
Metabolism; Lipid Metabolism; Secondary bile acid biosynthesis	0.000259337	0.000107122	0.000254223	7.80112e-05	0.715002	0.15387
Unclassified; Cellular Processes and Signaling; Germination	0.000206851	9.80302e-05	0.00026262	8.74561e-05	0.000999582	0.000575569
Metabolism; Biosynthesis of Other Secondary Metabolites; beta-Lactam resistance	0.000232804	8.18798e-05	0.000202877	9.21272e-05	0.0484756	0.0147539
Organismal Systems; Excretory System; Proximal tubule bicarbonate reclamation	0.000210863	8.07721e-05	0.000215078	7.76955e-05	0.95498	0.198819
Genetic Information Processing; Replication and Repair; Non-homologous end-joining	0.00021263	0.000128313	0.000156373	0.000140348	0.00139632	0.000769357
Metabolism; Lipid Metabolism; alpha-Linolenic acid metabolism	0.00016861	8.50143e-05	0.00016903	9.99478e-05	0.632543	0.140867
Human Diseases; Neurodegenerative Diseases; Parkinsons disease	0.000124012	8.68663e-05	0.000195988	0.000171272	0.0321743	0.0104919
Human Diseases; Infectious Diseases; Amoebiasis	0.000136958	4.47245e-05	0.000141412	4.48371e-05	0.500201	0.116256
Organismal Systems; Circulatory System; Cardiac muscle contraction	9.88655e-05	7.25647e-05	0.000174222	0.000157535	0.00978697	0.00417022
Metabolism; Xenobiotics Biodegradation and Metabolism; Fluorobenzoate degradation	0.000151396	0.000129261	0.00010406	0.00013588	0.00118283	0.00066316
Human Diseases; Cancers; Renal cell carcinoma	0.000148213	5.86723e-05	0.000123159	5.37804e-05	0.0309561	0.0101464
Metabolism; Lipid Metabolism; Steroid hormone biosynthesis	0.000128045	7.96985e-05	0.000115129	4.45208e-05	0.637915	0.141081
Metabolism; Biosynthesis of Other Secondary Metabolites; Flavonoid biosynthesis	0.000122726	5.51711e-05	0.000110938	6.10353e-05	0.237745	0.061026
Metabolism; Biosynthesis of Other Secondary Metabolites; Flavone and flavonol biosynthesis	9.89487e-05	4.45832e-05	0.000119922	4.77095e-05	0.00726303	0.00322372
Human Diseases; Neurodegenerative Diseases; Prion diseases	9.50033e-05	3.85078e-05	0.000117219	3.96232e-05	0.00220588	0.00112791
Metabolism; Biosynthesis of Other Secondary Metabolites; Stilbenoid, diarylheptanoid and gingerol biosynthesis	0.000137995	9.24878e-05	7.09023e-05	9.16535e-05	4.29429e-06	6.383e-06
Cellular Processes; Cell Growth and Death; Meiosis - yeast	0.000114502	8.39566e-05	8.58674e-05	9.55823e-05	0.00546495	0.00249494
Organismal Systems; Digestive System; Carbohydrate digestion and absorption	0.000124402	6.99857e-05	8.49811e-05	6.12359e-05	8.63152e-05	7.9954e-05
Unclassified; Genetic Information Processing; Transcription related proteins	0.00011919	6.0709e-05	8.41933e-05	8.85997e-05	3.88631e-07	9.19974e-07
Metabolism; Metabolism of Terpenoids and Polyketides; Carotenoid biosynthesis	0.000106851	0.000102214	7.08579e-05	0.0001052	0.000287241	0.000232392
Organismal Systems; Digestive System; Protein digestion and absorption	6.9932e-05	3.4012e-05	0.000116261	7.02112e-05	0.000146969	0.000125247
Genetic Information Processing; Folding, Sorting and Degradation; Ubiquitin system	9.80469e-05	6.81984e-05	6.55496e-05	5.87685e-05	0.00520743	0.00241183
Metabolism; Metabolism of Other Amino Acids; D-Arginine and D-ornithine metabolism	8.307e-05	4.35096e-05	7.37745e-05	2.85365e-05	0.703789	0.153002
Human Diseases; Infectious Diseases; African trypanosomiasis	9.02948e-05	5.19366e-05	6.02867e-05	4.22555e-05	0.00209238	0.0010785
Metabolism; Lipid Metabolism; Ether lipid metabolism	6.86731e-05	5.14887e-05	4.09055e-05	5.66872e-05	0.000109201	9.56106e-05
Cellular Processes; Cell Growth and Death; Apoptosis	8.08203e-05	6.16377e-05	3.47295e-05	2.53385e-05	8.30908e-07	1.75085e-06
Organismal Systems; Digestive System; Mineral absorption	5.14188e-05	2.24958e-05	5.04913e-05	2.42314e-05	0.585079	0.132139
Human Diseases; Infectious Diseases; Chagas disease (American trypanosomiasis)	5.0335e-05	4.28964e-05	4.10362e-05	4.66542e-05	0.0148615	0.00552252
Organismal Systems; Immune System; RIG-I-like receptor signaling pathway	5.84698e-05	5.21226e-05	3.21752e-05	2.8447e-05	3.22995e-06	5.37678e-06
Metabolism; Lipid Metabolism; Steroid biosynthesis	4.43433e-05	4.31242e-05	2.80161e-05	4.71529e-05	2.09499e-05	2.57502e-05
Human Diseases; Cancers; Bladder cancer	3.4044e-05	2.57045e-05	2.80566e-05	3.40607e-05	0.0111929	0.00449933
Metabolism; Glycan Biosynthesis and Metabolism; Various types of N-glycan biosynthesis	2.20527e-05	2.10868e-05	3.62337e-05	2.47535e-05	0.000379118	0.000291943
Organismal Systems; Environmental Adaptation; Circadian rhythm - plant	3.47013e-05	3.09033e-05	1.85932e-05	2.8533e-05	2.5178e-05	2.98009e-05
Genetic Information Processing; Transcription; Basal transcription factors	3.15289e-05	2.23138e-05	1.83546e-05	2.39445e-05	3.6512e-06	5.69185e-06
Cellular Processes; Cell Growth and Death; p53 signaling pathway	2.07742e-05	2.24611e-05	1.63629e-05	2.57742e-05	0.00075101	0.000480007
Human Diseases; Infectious Diseases; Influenza A	2.01991e-05	2.16087e-05	1.61614e-05	2.53791e-05	0.000818853	0.000508125
Human Diseases; Cancers; Small cell lung cancer	1.98412e-05	2.12114e-05	1.59747e-05	2.50154e-05	0.000918067	0.000543316
Human Diseases; Cardiovascular Diseases; Viral myocarditis	1.97738e-05	2.10815e-05	1.59212e-05	2.49518e-05	0.000944535	0.000548817
Human Diseases; Infectious Diseases; Toxoplasmosis	1.96233e-05	2.08901e-05	1.57816e-05	2.46739e-05	0.00089228	0.000538019
Human Diseases; Cancers; Colorectal cancer	1.95965e-05	2.08813e-05	1.57656e-05	2.466e-05	0.000918067	0.000543316
Human Diseases; Infectious Diseases; Vibrio cholerae infection	2.29655e-06	4.18873e-06	3.4861e-05	0.000209316	0.709388	0.153696
Metabolism; Xenobiotics Biodegradation and Metabolism; 1,1,1-Trichloro-2,2-bis(4-chlorophenyl)ethane (DDT) degradation	1.0918e-05	6.50208e-06	1.84996e-05	1.94203e-05	0.1418	0.0392343
Organismal Systems; Endocrine System; Renin-angiotensin system	1.1673e-05	1.10821e-05	1.28752e-05	2.26787e-05	0.000668578	0.000435217
Metabolism; Biosynthesis of Other Secondary Metabolites; Betalain biosynthesis	9.25498e-06	7.97247e-06	1.42188e-05	1.45421e-05	0.272501	0.0691145
Organismal Systems; Digestive System; Bile secretion	1.11242e-05	1.23746e-05	9.63924e-06	1.94643e-05	0.0212121	0.00725009
Metabolism; Biosynthesis of Other Secondary Metabolites; Indole alkaloid biosynthesis	7.32548e-06	6.50585e-06	1.29336e-05	1.34718e-05	0.182749	0.0480674
Human Diseases; Infectious Diseases; Bacterial invasion of epithelial cells	9.18695e-06	1.33096e-05	6.84824e-06	1.76326e-05	0.00449872	0.00211423
Metabolism; Biosynthesis of Other Secondary Metabolites; Caffeine metabolism	8.69577e-06	1.09957e-05	3.92766e-06	5.89557e-06	1.73968e-05	2.18023e-05
Human Diseases; Cardiovascular Diseases; Hypertrophic cardiomyopathy (HCM)	3.85958e-06	5.88865e-06	6.31506e-06	1.53137e-05	0.000674122	0.000435217
Metabolism; Biosynthesis of Other Secondary Metabolites; Isoflavonoid biosynthesis	4.89568e-06	6.12802e-06	3.03571e-06	5.83146e-06	0.000528125	0.000370935
Metabolism; Energy Metabolism; Photosynthesis - antenna proteins	5.84825e-06	1.54432e-05	2.40251e-06	5.75847e-06	0.00206413	0.0010785
Metabolism; Lipid Metabolism; Fatty acid elongation in mitochondria	4.93457e-06	1.74388e-05	1.33093e-06	1.41224e-06	0.000630561	0.000420773
Genetic Information Processing; Translation; mRNA surveillance pathway	3.00354e-06	3.93479e-06	1.7028e-06	3.40561e-06	0.000439102	0.000318922
Organismal Systems; Endocrine System; Melanogenesis	1.9029e-06	1.98151e-06	1.30433e-06	2.38646e-06	0.0107812	0.00444568
Human Diseases; Immune System Diseases; Systemic lupus erythematosus	1.93154e-06	2.08591e-06	1.03723e-06	1.70542e-06	0.000773028	0.000484392
Metabolism; Metabolism of Terpenoids and Polyketides; Biosynthesis of type II polyketide products	1.99487e-06	4.32682e-06	8.37802e-07	1.5671e-06	0.000674122	0.000435217
Human Diseases; Infectious Diseases; Shigellosis	1.86143e-06	7.98226e-06	5.66775e-07	1.09922e-06	0.0244358	0.00822006
Metabolism; Metabolism of Terpenoids and Polyketides; Biosynthesis of type II polyketide backbone	1.25703e-06	1.3742e-06	1.03605e-06	2.35444e-06	0.00639583	0.00287879
Metabolism; Metabolism of Terpenoids and Polyketides; Biosynthesis of 12-, 14- and 16-membered macrolides	1.17573e-06	1.07157e-06	8.29374e-07	1.62979e-06	0.00249401	0.00124535
Environmental Information Processing; Signaling Molecules and Interaction; G protein-coupled receptors	1.42785e-06	1.65557e-06	3.40232e-07	1.19288e-06	5.55348e-06	7.88777e-06
Environmental Information Processing; Signal Transduction; Wnt signaling pathway	1.2765e-06	1.5496e-06	4.25607e-07	9.03887e-07	0.000632	0.000420773
Human Diseases; Cancers; Chronic myeloid leukemia	1.2765e-06	1.5496e-06	4.25607e-07	9.03887e-07	0.000632	0.000420773
Environmental Information Processing; Signal Transduction; Notch signaling pathway	1.2765e-06	1.5496e-06	4.25607e-07	9.03887e-07	0.000632	0.000420773
Metabolism; Biosynthesis of Other Secondary Metabolites; Clavulanic acid biosynthesis	8.70195e-07	6.32735e-07	6.27561e-07	1.58184e-06	1.49716e-05	1.95287e-05
Organismal Systems; Immune System; Fc gamma R-mediated phagocytosis	7.01527e-07	8.89642e-07	2.8226e-07	6.21125e-07	9.03984e-07	1.75085e-06
Organismal Systems; Endocrine System; GnRH signaling pathway	7.02079e-07	8.89878e-07	2.81305e-07	6.21085e-07	9.03984e-07	1.75085e-06
Cellular Processes; Transport and Catabolism; Endocytosis	7.01527e-07	8.89642e-07	2.81305e-07	6.21085e-07	9.03984e-07	1.75085e-06
Metabolism; Enzyme Families; Cytochrome P450	5.51005e-07	5.4711e-07	3.72918e-07	6.74178e-07	0.00489926	0.00228566
Organismal Systems; Excretory System; Vasopressin-regulated water reabsorption	5.25743e-07	2.08968e-06	1.74572e-07	3.47794e-07	0.0179705	0.00634577
Environmental Information Processing; Signal Transduction; mTOR signaling pathway	3.45889e-07	5.35115e-07	1.92374e-07	4.29905e-07	0.0139241	0.00523828
Human Diseases; Infectious Diseases; Hepatitis C	3.45889e-07	5.35115e-07	1.92374e-07	4.29905e-07	0.0139241	0.00523828
Cellular Processes; Cell Growth and Death; Cell cycle	3.45889e-07	5.35115e-07	1.92374e-07	4.29905e-07	0.0139241	0.00523828
Human Diseases; Infectious Diseases; Measles	3.45889e-07	5.35115e-07	1.92374e-07	4.29905e-07	0.0139241	0.00523828
Environmental Information Processing; Signal Transduction; Calcium signaling pathway	3.50596e-07	9.92909e-07	1.52556e-07	3.94868e-07	0.00744397	0.00328124
Environmental Information Processing; Signal Transduction; VEGF signaling pathway	2.45269e-07	3.44652e-07	2.09087e-07	4.04616e-07	0.0105072	0.00436081
Human Diseases; Infectious Diseases; Leishmaniasis	2.44717e-07	3.4425e-07	2.09087e-07	4.04616e-07	0.0105072	0.00436081
Metabolism; Metabolism of Terpenoids and Polyketides; Sesquiterpenoid biosynthesis	2.88716e-07	3.52978e-07	1.65185e-07	3.17509e-07	0.00421479	0.00199547
Cellular Processes; Cell Communication; Focal adhesion	2.25583e-07	2.46123e-07	2.06976e-07	3.90055e-07	0.0520853	0.0157774
Metabolism; Glycan Biosynthesis and Metabolism; Glycosphingolipid biosynthesis - lacto and neolacto series	2.17644e-07	2.4838e-07	2.30256e-07	3.42598e-07	0.537526	0.122263
Cellular Processes; Transport and Catabolism; Phagosome	1.7842e-07	2.21163e-07	1.66271e-07	3.41124e-07	0.0950397	0.0276111
Human Diseases; Cardiovascular Diseases; Arrhythmogenic right ventricular cardiomyopathy (ARVC)	1.77349e-07	2.21788e-07	1.55558e-07	3.36568e-07	0.0395319	0.0121475
Cellular Processes; Cell Communication; Tight junction	1.77349e-07	2.21788e-07	1.55558e-07	3.36568e-07	0.0395319	0.0121475
Human Diseases; Cardiovascular Diseases; Dilated cardiomyopathy (DCM)	1.77349e-07	2.21788e-07	1.55558e-07	3.36568e-07	0.0395319	0.0121475
Organismal Systems; Immune System; Leukocyte transendothelial migration	1.77349e-07	2.21788e-07	1.55558e-07	3.36568e-07	0.0395319	0.0121475
Human Diseases; Infectious Diseases; Pathogenic Escherichia coli infection	1.77349e-07	2.21788e-07	1.55558e-07	3.36568e-07	0.0395319	0.0121475
Cellular Processes; Cell Motility; Regulation of actin cytoskeleton	1.77349e-07	2.21788e-07	1.55558e-07	3.36568e-07	0.0395319	0.0121475
Cellular Processes; Cell Communication; Adherens junction	1.77349e-07	2.21788e-07	1.55558e-07	3.36568e-07	0.0395319	0.0121475
Organismal Systems; Sensory System; Phototransduction - fly	1.77349e-07	2.21788e-07	1.55558e-07	3.36568e-07	0.0395319	0.0121475
Organismal Systems; Immune System; Hematopoietic cell lineage	2.05383e-07	1.98532e-07	8.83459e-08	1.65863e-07	3.17758e-05	3.56306e-05
Metabolism; Glycan Biosynthesis and Metabolism; Glycosylphosphatidylinositol(GPI)-anchor biosynthesis	1.80304e-07	2.70626e-07	6.27246e-08	2.35638e-07	0.000836597	0.000514144
Genetic Information Processing; Transcription; Spliceosome	1.4145e-07	9.79992e-07	1.19554e-09	8.10854e-09	1	0.205514
Organismal Systems; Digestive System; Pancreatic secretion	8.0544e-08	9.8646e-08	6.04173e-08	1.01453e-07	0.066754	0.0198445
Environmental Information Processing; Signaling Molecules and Interaction; Neuroactive ligand-receptor interaction	7.93938e-08	9.78874e-08	4.7855e-08	9.04969e-08	0.0131626	0.00512979
Environmental Information Processing; Signaling Molecules and Interaction; ECM-receptor interaction	4.82347e-08	8.53056e-08	5.14187e-08	1.80302e-07	0.0543582	0.0163113
Environmental Information Processing; Signaling Molecules and Interaction; CAM ligands	4.82347e-08	8.53056e-08	5.14187e-08	1.80302e-07	0.0543582	0.0163113
Organismal Systems; Excretory System; Aldosterone-regulated sodium reabsorption	2.97617e-08	3.76188e-08	2.59187e-08	5.39493e-08	0.161999	0.0435048
Environmental Information Processing; Signaling Molecules and Interaction; Glycan bindng proteins	1.82837e-08	4.7269e-08	2.1405e-08	6.65709e-08	0.320699	0.0781311
Organismal Systems; Digestive System; Salivary secretion	5.97571e-10	4.14009e-09	8.44002e-09	3.47006e-08	0.158537	0.0430729
Organismal Systems; Excretory System; Endocrine and other factor-regulated calcium reabsorption	5.97571e-10	4.14009e-09	8.44002e-09	3.47006e-08	0.158537	0.0430729
Organismal Systems; Digestive System; Gastric acid secretion	5.97571e-10	4.14009e-09	8.44002e-09	3.47006e-08	0.158537	0.0430729
Metabolism; Glycan Biosynthesis and Metabolism; Glycosaminoglycan biosynthesis - chondroitin sulfate	2.17985e-09	9.14559e-09	4.05048e-09	1.25093e-08	0.398707	0.0940343
Organismal Systems; Digestive System; Fat digestion and absorption	5.52641e-10	3.82881e-09	9.55197e-10	6.47846e-09	0.975861	0.201851
Environmental Information Processing; Signaling Molecules and Interaction; Cytokine-cytokine receptor interaction	0	0	5.07916e-10	3.44485e-09	0.317201	0.0776777
Organismal Systems; Circulatory System; Vascular smooth muscle contraction	5.52641e-10	3.82881e-09	0	0	0.338232	0.0806645
Organismal Systems; Immune System; Fc epsilon RI signaling pathway	5.52641e-10	3.82881e-09	0	0	0.338232	0.0806645
Environmental Information Processing; Signal Transduction; MAPK signaling pathway	5.52641e-10	3.82881e-09	0	0	0.338232	0.0806645
Environmental Information Processing; Signaling Molecules and Interaction; Cytokine receptors	0	0	5.07916e-10	3.44485e-09	0.317201	0.0776777
Organismal Systems; Nervous System; Long-term depression	5.52641e-10	3.82881e-09	0	0	0.338232	0.0806645
